# Supplementary material for: Spider web-structured Sb2MoO6@C@CNF composites with conductive-stable dual carbon skeletons toward durable sodium-ion batteries
Source: Royal Society of Chemistry journal article supplement (doi:10.1039/d5ce00188a), 2025-01-01
Supplement: d5ce00188a1.pdf [file d5ce00188a1.pdf]

## Supplementary Materials

### **Spider Web-Structured $\text{Sb}_2\text{MoO}_6@\text{C}@\text{CNFs}$ Composites with Conductive-Stable Dual Carbon Skeletons Toward Durable Sodium-Ion Batteries**

Zihan Zhou, Yaping Zeng,\* Zilong Li, Tao Li and Liu Wang\*

Corresponding Author: \*E-mail: [zyp@glut.edu.cn](mailto:zyp@glut.edu.cn) and [wl@glut.edu.cn](mailto:wl@glut.edu.cn)

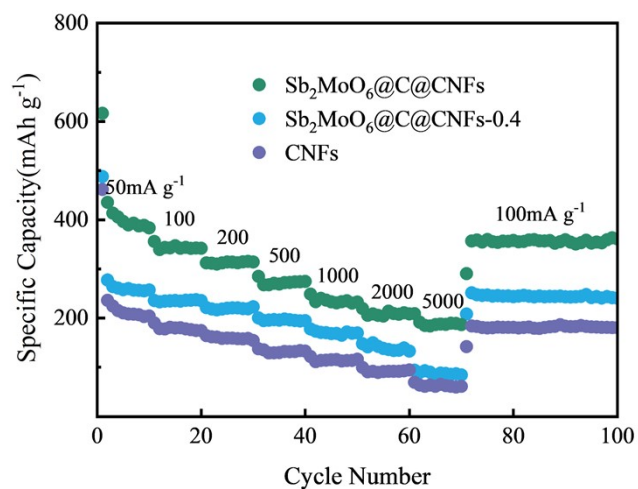

**Figure S1** Rate Performance Comparison between  $\text{Sb}_2\text{MoO}_6@\text{C}@\text{CNFs}$ 、 $\text{Sb}_2\text{MoO}_6@\text{C}@\text{CNFs-0.4}$ 、CNFs

We reduced the ratio of  $\text{Sb}_2\text{MoO}_6@\text{PPY}$  when preparing the spinning solution. Under the premise that the amount of the solvent N, N-dimethylformamide is 8 mL, the amount of  $\text{Sb}_2\text{MoO}_6@\text{PPY}$  added is reduced to 0.4 g, and the remaining preparation steps remain unchanged. Then  $\text{Sb}_2\text{MoO}_6@\text{C}@\text{CNFs-0.4}$  is prepared. In addition, pure carbon materials CNFs were prepared as controls. Its rate performance is tested, as shown in the **Figure S1**. Compared to Figure 6b, there is a thicker carbon layer due to the decrease in the content of  $\text{Sb}_2\text{MoO}_6$  and the decrease in the active material involved in the reaction. Therefore, the specific capacity of  $\text{Sb}_2\text{MoO}_6@\text{C}@\text{CNFs-0.4}$  is relatively low. However, the toughness of the carbon material is leveraged due to the thicker carbon coating, thereby enabling the rate performance of  $\text{Sb}_2\text{MoO}_6@\text{C}@\text{CNFs-0.4}$  to be closer to that of carbon-based materials. When the current density is 50, 100, 200, 500, 1000, 2000, and 5000  $\text{mA g}^{-1}$ , the  $\text{Sb}_2\text{MoO}_6@\text{C}@\text{CNFs-0.4}$  electrode delivers reversible capacities of 257, 235, 314, 196, 170, 142, and 90  $\text{mAh g}^{-1}$ , respectively.

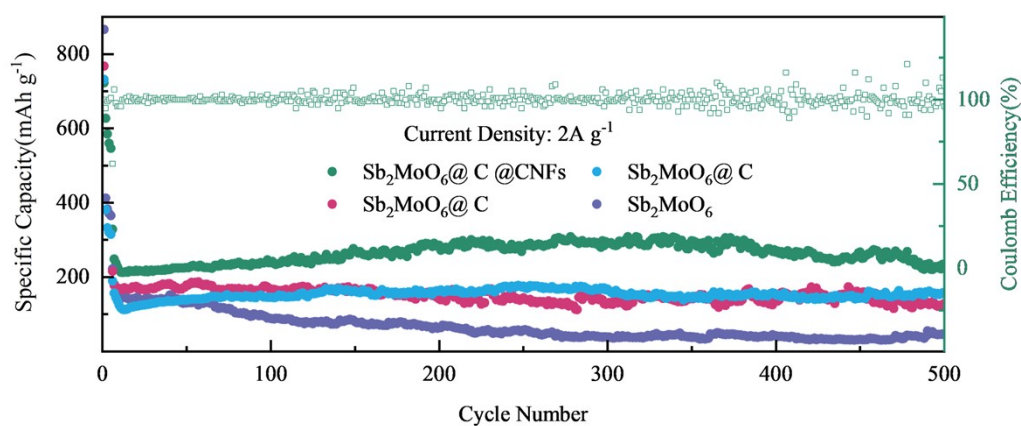

**Figure S2** Cycling performance of Sb<sub>2</sub>MoO<sub>6</sub>@C@CNFs , Sb<sub>2</sub>MoO<sub>6</sub>@CNFs , Sb<sub>2</sub>MoO<sub>6</sub>@C , Sb<sub>2</sub>MoO<sub>6</sub> at a current density of 2A g<sup>-1</sup>

The cycling performance of Sb<sub>2</sub>MoO<sub>6</sub>@CNFs anode materials was tested at a current density of 2A g<sup>-1</sup>. The results of the tests are shown in **Figure S2**. Sb<sub>2</sub>MoO<sub>6</sub>@C@CNFs 、Sb<sub>2</sub>MoO<sub>6</sub>@C and Sb<sub>2</sub>MoO<sub>6</sub> @CNFs showed a small increase during cycling at large current densities. Specifically compare the differences in electrochemical properties produced by different carbon coating methods. The Sb<sub>2</sub>MoO<sub>6</sub>@C formed by PPY encapsulation focuses on individual particles, so the active substances encapsulated therein do not react sufficiently, and the specific capacity is slightly lower than that of the material encapsulated by CNFs. And the CNFs constitute a three-dimensional network structure, which helps the electron transport. The combination of carbon shells and CNFs formed a unique spider web structure, which provided more channels and pathways for ion diffusion. Meanwhile, the synergistic effect of the two realizes the structural improvement from particles to networks. The multiple buffers more effectively limit the volume expansion and contraction of the material, resulting in good structural stability. And since the essence of both approaches is to inhibit the volume expansion during the electrochemical process through the constraint of carbon skeleton, the discharge specific capacity after 500 cycles is very close.

**Table S1** The cycling stability of  $\text{Sb}_2\text{MoO}_6@\text{C}@\text{CNFs}$  at high current densities is compared with that of other reported Sb-based anodes for sodium-ion batteries (SIBs).

| Materials                                                  | Current<br>(A g <sup>-1</sup> ) | Cycles      | Capacity (mAh g <sup>-1</sup> ) |
|------------------------------------------------------------|---------------------------------|-------------|---------------------------------|
| $\text{MoS}_2@\text{Sb}_2\text{S}_3/\text{rGO}^1$          | 5                               | 1100        | 162                             |
| $\text{Sb}_2\text{MoO}_6$ microspheres <sup>2</sup>        | 2                               | 450         | 460.6                           |
| $\text{Sb}@\text{CN}$ spherical shell <sup>3</sup>         | 0.66                            | 5000        | 282                             |
| $\text{Sb}_2\text{Se}_3/\text{Sb}/\text{CN}-0.5\text{T}^4$ | 1                               | 600         | 181                             |
| $\text{Sb}@\text{3D-Cu}^5$                                 | 1                               | 200         | 289.6                           |
| $\text{Sn}/\text{Sb}@\text{SSO}@\text{PCFs}^6$             | 0.05                            | 450         | 440                             |
| 3D Sb/C <sup>7</sup>                                       | 1                               | 200         | 257.9                           |
| ZnS-Sb/C <sup>8</sup>                                      | 1                               | 300         | 210.3                           |
| MXene-Sb/ $\text{Sb}_2\text{S}_3@\text{C}-1^9$             | 1                               | 2500        | 250                             |
| <b>This work</b>                                           | <b>5</b>                        | <b>5000</b> | <b>210</b>                      |

## References

1. M. Zhu, J. Li, X. Yang, X. Li, L. Wang and W. Lü, *Applied Surface Science*, 2023, **624**.
2. X. Lu, Z. Wang, K. Liu, J. Luo, P. Wang, C. Niu, H. Wang and W. Li, *Energy Storage Materials*, 2019, **17**, 101-110.
3. Q. Mao, Y. Jia, W. Zhu and L. Gao, *Journal of Solid State Electrochemistry*, 2023, **27**, 1433-1441.
4. Q. Luo, J. Wen, G. Liu, Z. Ye, Q. Wang, L. Liu and X. Yang, *Journal of Power Sources*, 2022, **545**.
5. H. Gao, W. Gao and M. Pumera, *Advanced Functional Materials*, 2024, **34**.
6. X. Chen, N. Zhang, P. He and X. Ding, *Journal of Alloys and Compounds*, 2023, **938**.
7. Y. Liu, J. Shi, M. Su, F. Gao and Q. Lu, *Journal of Alloys and Compounds*, 2022, **914**.
8. M. Zhu, Y. Jiang, X. Yang, X. Li, L. Wang and W. Lü, *ACS Applied Nano Materials*, 2023, **6**, 13503-13512.
9. D. Wang, Q. Ma, H. He, Z.-Y. Wang, R.-G. Zheng, H.-Y. Sun, Y.-G. Liu and C.-L. Liu, *Rare Metals*, 2024, **43**, 2067-2079.
